# Supplementary material for: Drug Cost Avoidance Resulting from Participation in Clinical Trials: A 10-Year Retrospective Analysis of Cancer Patients with Solid Tumors
Source: MDPI journal article supplement (doi:10.3390/cancers16081529), 2024-04-17
Supplement: s1 [file s1]

**Table S1.** Pharmaceutical expenditure (€) by antineoplastic agent and study year (2010-2019) in patients treated in clinical trials.

| Antineoplastic agent           | 2010     | 2011     | 2012     | 2013     | 2014     | 2015     | 2016       | 2017       | 2018       | 2019       |
|--------------------------------|----------|----------|----------|----------|----------|----------|------------|------------|------------|------------|
| Pembrolizumab                  |          |          |          | - €      | - €      | - €      | €1,526,631 | €2,105,884 | €3,525,719 | €3,590,128 |
| Nivolumab                      |          |          |          | - €      | - €      | - €      | - €        | €2,530,787 | €3,199,054 | €2,489,205 |
| Cabozantinib                   |          |          |          |          |          |          |            | €11,090    | €680,013   | €2,392,934 |
| Atezolizumab                   |          |          | - €      | - €      | - €      | - €      | - €        | - €        | €1,494,348 | €2,072,251 |
| Bevacizumab                    | €449,063 | €204,025 | €318,207 | €579,672 | €489,726 | €409,087 | €477,342   | €642,297   | €1,023,346 | €1,696,850 |
| Palbociclib                    |          |          |          |          |          |          |            | €387,046   | €1,738,509 | €1,449,416 |
| Olaparib                       |          |          |          |          |          |          |            | €1,286,924 | €869,931   | €1,338,767 |
| Lorlatinib                     |          |          |          |          |          |          |            |            | - €        | €1,094,263 |
| Pembrolizumab/placebo          |          |          |          |          |          | €3,657   | €470,670   | €645,426   | €855,752   | €1,076,734 |
| Ipilimumab                     |          |          |          | €71,092  | €52,203  | €134,857 | €96,621    | €748,814   | €1,380,972 | €786,563   |
| Pemetrexed                     | €145,919 | €78,780  | €179,178 | €91,434  | €62,875  | €223,909 | €309,456   | €435,349   | €323,262   | €615,426   |
| Pertuzumab                     |          |          | €22,641  | €156,240 | €217,308 | €387,877 | €490,616   | €274,680   | €878,976   | €581,406   |
| Avelumab                       |          |          |          |          |          | - €      | - €        | €172,558   | €370,115   | €568,416   |
| Abiraterone                    |          |          |          | €245,325 | €215,847 | €454,641 | €928,284   | €872,218   | €610,713   | €500,525   |
| Trastuzumab                    | €919,484 | €718,598 | €765,697 | €615,885 | €593,591 | €651,436 | €502,267   | €401,915   | €769,736   | €488,859   |
| Cetuximab                      | €145,079 | €67,061  | €169,198 | €419,618 | €800,388 | €342,754 | €211,159   | €331,935   | €288,909   | €393,887   |
| Lenvatinib                     |          |          |          |          |          |          |            | €307,834   | €521,834   | €386,417   |
| Dinutuximab                    |          |          |          |          |          |          |            | €684,721   | €822,198   | €348,727   |
| Atezolizumab/placebo           |          |          |          |          |          |          | - €        | - €        | €237,062   | €326,071   |
| Osimertinib                    |          |          |          |          |          |          |            | €19,653    | €170,345   | €300,502   |
| Sunitinib                      |          |          |          |          | €40,167  | €90,366  | €308,665   | €267,347   | €422,064   | €299,648   |
| Nivolumab-relatlimab/nivolumab |          |          |          |          |          |          |            |            | €88,583    | €289,907   |
| Axitinib                       |          |          |          |          | €100,647 | €246,675 | €83,063    | €278,955   | €266,395   | €280,784   |
| Enzalutamide                   |          |          |          |          |          |          | €240,697   | €182,327   | €240,260   | €274,395   |

|                                |          |          |          |          |            |            |          |            |          |          |
|--------------------------------|----------|----------|----------|----------|------------|------------|----------|------------|----------|----------|
| Apalutamide                    |          |          |          |          |            |            |          |            | - €      | €259,110 |
| Ipilimumab/placebo             | - €      | - €      | - €      | €519,158 | €1,465,434 | €76,700    | €399,414 | €550,983   | €800,659 | €222,315 |
| Alecnitib                      |          |          |          |          |            |            |          |            | €134,477 | €204,002 |
| Panitumumab                    | €129,287 | €107,097 | €61,269  | €46,033  | €142,799   | €100,506   | €136,919 | €44,676    | €41,173  | €183,675 |
| Nivolumab/placebo              |          |          |          | - €      | - €        | €7,127     | €42,981  | €146,514   | €216,392 | €183,521 |
| Niraparib                      |          |          |          |          |            |            |          |            | - €      | €181,838 |
| Olaratumab/placebo             |          |          |          |          |            | - €        | - €      | - €        | €49,043  | €181,812 |
| Ribociclib                     |          |          |          |          |            |            |          | €182,270   | €433,927 | €178,670 |
| Dabrafenib                     |          |          |          |          | €5,596     | €127,578   | €281,742 | €175,308   | €205,691 | €173,907 |
| Trastuzumab-DM1                | - €      | - €      | - €      | - €      | €219,907   | €1,196,442 | €947,493 | €1,742,676 | €609,442 | €168,581 |
| Nab-Paclitaxel                 |          |          | €18,296  | €27,430  | €87,911    | €235,701   | €221,171 | €196,538   | €176,011 | €164,481 |
| Binimetinib                    |          |          |          |          |            |            |          |            | - €      | €161,398 |
| Ibrutinib                      |          |          |          | €55,056  | €25,233    |            | €279,320 | €465,700   | €170,625 | €146,275 |
| Everolimus                     |          |          |          | €749,254 | €505,522   | €389,669   | €321,077 | €249,768   | €284,736 | €121,903 |
| Encorafenib                    |          |          |          |          |            |            |          |            | - €      | €119,787 |
| Gefitinib                      |          |          |          | €74,746  | €25,024    | €83,114    | €11,806  |            | €24,556  | €114,629 |
| Irinotecan pegylated liposomal |          |          | - €      | - €      | - €        |            |          |            | - €      | €111,976 |
| Streptozocin                   |          |          |          |          |            | €43,620    | €133,079 | €185,122   | €149,064 | €105,370 |
| Trifluridine-tipiracil         |          |          |          |          |            |            |          | €116,199   | €31,120  | €88,155  |
| Olaratumab                     | - €      |          |          |          |            |            | - €      | €40,504    | €74,496  | €82,608  |
| Ceritinib                      |          |          |          |          |            |            |          |            | €132,222 | €74,242  |
| Talimogen laherparepvec        |          |          |          |          |            |            |          |            |          | €66,080  |
| Trabectedin                    |          | €221,627 | €189,730 | €62,459  | €10,870    | €14,464    |          | €6,205     |          | €63,041  |
| Crizotinib                     |          |          |          |          | €168,476   | €232,613   | €132,684 | €70,808    | €77,750  | €54,148  |
| Cobimetinib                    |          |          |          |          |            |            | €93,158  | €213,929   | €175,978 | €51,758  |
| Regorafenib                    |          |          |          |          |            | €34,171    | €213,234 | €438,785   | €170,585 | €50,471  |
| Vemurafenib                    |          |          |          |          | €183,770   | €297,160   | €111,461 | €269,670   | €229,312 | €43,975  |

[illegible]

**Table S2.** Pharmaceutical expenditure (€) by tumor location and study year (2010-2019), in patients treated with intravenous antineoplastic agents in clinical trials.

| Tumor location         | 2010       | 2011       | 2012     | 2013     | 2014       | 2015       | 2016       | 2017       | 2018       | 2019       |
|------------------------|------------|------------|----------|----------|------------|------------|------------|------------|------------|------------|
| Lung, non-small cell   | €235,003   | €85,644    | €322,970 | €527,525 | €574,879   | €673,306   | €1,817,333 | €3,148,040 | €4,096,789 | €4,610,748 |
| Advanced solid tumor   | €31,986    | €62,158    | €111,623 | €46,789  | €1,038     | €73,622    | €129,695   | €1,381,773 | €1,300,154 | €1,719,683 |
| Breast                 | €1,139,772 | €1,004,107 | €972,966 | €978,946 | €1,298,163 | €2,129,659 | €2,084,398 | €2,791,650 | €2,683,329 | €1,617,218 |
| Colon                  | €443,525   | €170,947   | €398,663 | €603,419 | €946,419   | €427,147   | €306,086   | €773,479   | €1,128,681 | €1,363,323 |
| Ovary                  | €351,883   | €142,430   | €59,621  | €203,510 | €50,775    | €20,743    | €215,313   | €26,356    | €590,948   | €1,187,763 |
| Melanoma               |            | - €        |          | €140,924 | €107,840   | €7,127     | - €        | €628,359   | €1,495,009 | €1,053,360 |
| Kidney                 | €415       |            |          | - €      |            | €78,790    | €245,147   | €480,786   | €813,247   | €889,629   |
| Pancreas exocrine      | €5,645     | €5,493     | €11,862  | €30,493  | €28,421    | €236,770   | €185,934   | €173,100   | €279,369   | €502,900   |
| Uterine cervix         |            | €61,084,45 | €6,765   | €2,821   |            | - €        | €63,421    | €329,780   | €596,276   | €461,946   |
| Lung, small cell       | €4,634     | - €        | €3,841   | €472,254 | €1,410,499 | €77,120    | €428,949   | €1,292,808 | €1,149,831 | €443,215   |
| Endometrium            | €241       | €682       | €163     | €4,350   | €402       | €91        | €185       | €5,146     | €360,130   | €399,268   |
| Urinary bladder        | €1,055     | - €        | €9,274   | €41,234  | €31,204    | €47,944    | €33,305    | €58,388    | €586,421   | €381,720   |
| Stomach                | €8,088     | €24,793    | €69,671  | €50,901  | €113,439   | €117,873   | €332,654   | €365,387   | €634,772   | €371,229   |
| Oral cavity/oropharynx | €9,707     | €51        | €1,375   | €24      | €13,584    | €91,534    | €105,920   | €362,824   | €642,871   | €353,491   |
| Mesothelioma           |            |            | €262     | €110     | - €        | - €        | €34,648    | €134,060   | €57,194    | €287,729   |
| Esophagus              |            | - €        |          | - €      | €64        | €6,050     |            | €29,335    | €237,976   | €248,560   |
| Soft tissue sarcoma    | €267       | €26,893    | €75,590  | €64,199  | €12,081    | €17,413    | €6,906     | €26,165    | €132,348   | €233,637   |
| Rhinopharynx/cavum     |            |            |          |          |            |            | - €        | €130,949   | €410,423   | €202,101   |
| Neuroendocrine         |            |            |          |          |            | €43,731    | €133,419   | €204,239   | €168,070   | €126,169   |
| Hepatic carcinoma      |            |            |          |          |            |            | - €        | €30,721    | €16,085    | €118,423   |
| Thymoma                |            |            |          |          |            |            |            |            | €14,092    | €111,878   |

|                        |             |            |            |            |            |            |            |             |             |             |
|------------------------|-------------|------------|------------|------------|------------|------------|------------|-------------|-------------|-------------|
| Brain                  |             | - €        | - €        |            | - €        | €23,698    | €14,745    | €139,210    | €145,677    | €86,069     |
| Prostate               | €142,301    | €80,071    | €150,047   | €155,566   | €35,583    | €36,306    | €58,744    | €105,282    | €31,916     | €80,384     |
| Squamous cell skin     |             |            |            |            |            |            |            |             | €72,420,00  | €76,975     |
| Larynx/hypopharynx     |             |            | - €        | - €        | €4,672     | €3,430     | €8,020,    | €17,082     | €106,785    | €59,377     |
| Rectum                 | €37,596     | €4,954     | €322       | €5,474     | €5,438     | €4,301     | €11,304    | €13,034     | €31,196     | €38,537     |
| Basal cell carcinoma   |             |            |            |            |            |            |            |             | €53,108     | €33,102     |
| Merkel carcinoma       |             |            |            |            |            |            |            |             |             | €12,316     |
| Extrahepatic bile duct | - €         |            |            |            |            |            |            |             |             | €3,211      |
| Urothelial cancer      |             |            |            |            |            |            |            |             |             | €693        |
| Adrenal                |             |            |            |            |            |            | €10        | - €         |             |             |
| Anus                   |             | €17,972    | €7,639     |            |            |            |            |             | - €         |             |
| Testicular germ cell   |             | - €        |            |            |            |            | - €        |             | - €         |             |
| GIST                   |             |            |            |            |            |            |            |             | - €         |             |
| Osteosarcoma           |             | - €        |            | €3,194     |            |            |            |             |             |             |
| Pancreas endocrine     | €45,724     | €11,914    | €425       | €172       | €56        |            |            |             | - €         |             |
| Primary unknown        |             |            |            |            | €36        | €802       | €287       |             |             |             |
| Ewing sarcoma          |             | €1,051     | €544       |            | €1,976     | €3,130     | €3,885     | €8,636      | €9,620      |             |
| Thyroid                |             |            |            |            |            |            | - €        | €19,312     | - €         |             |
| Total (annual)         | €2,457,849  | €1,700,250 | €2,203,633 | €3,331,912 | €4,636,490 | €4,120,596 | €6,220,320 | €12,675,915 | €17,844,750 | €17,074,664 |
| Total (overall)        | €72,266,379 |            |            |            |            |            |            |             |             |             |

GIST: Gastrointestinal Stromal Tumors

**Table S3.** Mean annual cost of antineoplastic treatment per patient (€) per tumor location and study year (2010-2019), in patients treated in the Health care setting.

| <b>Tumor location</b>   | <b>2010</b> | <b>2011</b> | <b>2012</b> | <b>2013</b> | <b>2014</b> | <b>2015</b> | <b>2016</b> | <b>2017</b> | <b>2018</b> | <b>2019</b> |
|-------------------------|-------------|-------------|-------------|-------------|-------------|-------------|-------------|-------------|-------------|-------------|
| Adrenal                 |             |             |             |             |             |             | €173        | €243        | €4,747      | €55         |
| Advanced solid tumor    | €682        | €6,643      | €2,706      | €5,356      |             | €707        | €8,805      | €2,372      | €4,788      | €4,316      |
| Anus                    | €79         | €95         | €108        | €139        | €50         | €56         | €86         | €840        | €5,588      | €2,252      |
| Basal cell carcinoma    |             |             |             |             |             | €69,264     | €56,561     | €12,888     | €12,888     | €25,776     |
| Brain                   | €10,415     | €6,032      | €2,548      | €3,172      | €2,063      | €3,707      | €4,416      | €2,189      | €1,839      | €2,421      |
| Breast                  | €6,290      | €5,111      | €5,284      | €4,847      | €6,002      | €6,414      | €7,870      | €6,938      | €8,833      | €10,112     |
| Colon                   | €4,541      | €3,086      | €3,016      | €1,898      | €1,943      | €2,725      | €3,649      | €3,895      | €4,091      | €5,475      |
| Cutaneous tumors, other |             |             |             |             |             |             |             |             |             | €6,874      |
| Endometrium             | €742        | €223        | €182        | €153        | €151        | €141        | €123        | €142        | €641        | €588        |
| Esophagus               | €273        | €168        | €197        | €105        | €97         | €105        | €89         | €156        | €99         | €80         |
| Ewing sarcoma           | €1,273      | €548        | €1,239      | €600        | €923        | €931        | €2,702      | €789        | €2,191      | €3,208      |
| Extrahepatic bile duct  | €461        | €455        | €511        | €453        | €199        | €165        | €337        | €349        | €246        | €424        |
| Gallbladder             | €762        |             |             | €1,177      | €123        | €97         |             |             | €100        | €78         |
| GIST                    | €20,533     | €28,797     | €23,108     | €17,643     | €20,883     | €21,609     | €22,417     | €9,338      | €8,556      | €4,459      |
| Hepatic carcinoma       | €12,221     | €40,195     | €3,404      | €8,965      | €6,082      |             | €56         | €3,482      | €5,535      | €7,673      |
| Kaposi sarcoma          | €5,307      | €3,289      | €1,700      | €3,181      | €613        | €4,164      | €2,240      | €6,254      | €634        | €877        |
| Kidney                  | €19,641     | €20,735     | €18,901     | €14,380     | €15,437     | €23,994     | €19,363     | €19,043     | €20,123     | €21,267     |
| Larynx/hypopharynx      | €1,879      | €515        | €35         | €2,411      | €4,463      | €4,968      | €3,142      | €4,407      | €8,373      | €6,837      |
| Lung, non-small cell    | €3,545      | €4,428      | €4,114      | €3,248      | €4,588      | €5,730      | €6,230      | €9,863      | €8,618      | €8,371      |
| Lung, small cell        | €841        | €910        | €416        | €168        | €105        | €115        | €182        | €240        | €418        | €115        |
| Melanoma                | €1,911      | €928        | €811        | €928        | €20,186     | €28,412     | €25,524     | €24,676     | €29,935     | €37,020     |

|                        |         |         |         |         |         |         |         |         |         |         |
|------------------------|---------|---------|---------|---------|---------|---------|---------|---------|---------|---------|
| Merkel carcinoma       |         |         |         |         |         |         |         |         | €7,020  |         |
| Mesothelioma           | €6,873  | €7,329  | €5,049  | €5,995  | €4,382  | €4,663  | €4,630  | €5,204  | €8,808  | €85     |
| Neuroendocrine         | €24,782 | €5,458  | €8,550  | €11,358 | €11,914 | €10,872 | €16,484 | €15,599 | €13,683 | €14,492 |
| Oral cavity/oropharynx | €4,486  | €2,407  | €2,314  | €2,902  | €2,954  | €3,302  | €3,954  | €5,695  | €4,375  | €5,581  |
| Osteosarcoma           | €1,568  | €655    | €124    | €268    | €573    | €1,040  | €1,337  | €2,946  | €1,127  | €98     |
| Ovary                  | €3,598  | €1,860  | €1,536  | €1,457  | €1,370  | €2,392  | €3,309  | €4,859  | €7,636  | €5,828  |
| Pancreas endocrine     | €2,311  | €6,408  | €13,820 | €5,013  | €9,309  | €17,201 | €23,747 | €4,475  | €4,661  | €134    |
| Pancreas exocrine      | €879    | €627    | €572    | €906    | €1,308  | €1,712  | €955    | €1,263  | €1,702  | €2,471  |
| Penis                  | €11,918 | €146    |         | €14     | €343    | €49     | €162    | €76     | €140    | €95     |
| Primary unknown        | €172    | €177    | €738    | €463    | €171    | €1,658  | €126    | €304    | €1,594  | €8,228  |
| Prostate               | €2,992  | €992    | €3,303  | €6,585  | €9,092  | €12,526 | €11,195 | €14,719 | €12,893 | €14,118 |
| Rectum                 | €1,581  | €1,205  | €1,221  | €1,408  | €1,006  | €1,541  | €2,791  | €1,570  | €2,185  | €2,626  |
| Rhinopharynx/cavum     | €2      |         |         |         | €66     | €72     | €147    | €84     | €531    | €115    |
| Soft tissue sarcoma    | €10,239 | €4,445  | €2,472  | €4,500  | €3,179  | €4,639  | €7,756  | €6,545  | €15,329 | €7,824  |
| Squamous cell skin     |         |         |         |         |         |         |         |         |         | €48     |
| Stomach                | €772    | €1,143  | €1,012  | €1,390  | €903    | €1,521  | €1,680  | €2,692  | €2,962  | €3,130  |
| Testicular germ cell   | €295    | €233    | €294    | €176    | €553    | €1,587  | €679    | €133    | €213    | €512    |
| Thymoma                |         | €110    | €122    | €120    | €52     | €58     | €172    |         | €89     | €219    |
| Thyroid                | €40,688 | €33,975 | €8,479  | €6,164  | €12,645 | €23,027 | €20,388 | €14,118 | €17,498 | €16,256 |
| Urinary bladder        | €913    | €754    | €353    | €318    | €192    | €179    | €236    | €48     | €184    | €1,319  |
| Uterine cervix         | €893    | €693    | €106    | €60     | €1,650  | €859    | €1,481  | €1,184  | €9,187  | €3,968  |

GIST: Gastrointestinal Stromal Tumors

**Table S4.** Potential drug cost (€) avoided by tumor location and study year (2010-2019) in patients treated with intravenous antineoplastic agents in clinical trials.

| <b>Tumor location</b>   | <b>2010</b> | <b>2011</b> | <b>2012</b> | <b>2013</b> | <b>2014</b> | <b>2015</b> | <b>2016</b> | <b>2017</b> | <b>2018</b> | <b>2019</b> |
|-------------------------|-------------|-------------|-------------|-------------|-------------|-------------|-------------|-------------|-------------|-------------|
| Adrenal                 | - €         | - €         | - €         | - €         | - €         | - €         | €173        | €232        | - €         | €27         |
| Advanced solid tumor    | - €         | €14,560     | - €         | €643,520    | - €         | €5,022      | - €         | - €         | €79,191     | €45,741     |
| Anus                    | - €         | €216        | €28         | - €         | - €         | - €         | - €         | - €         | €27,720     | €25,030     |
| Basal cell carcinoma    | - €         | - €         | - €         | - €         | - €         | - €         | - €         | - €         | - €         | - €         |
| Brain                   | - €         | €3,680      | €1,327      | - €         | €3,112      | €40,990     | €11,218     | €5,622      | €11,956     | €34,322     |
| Breast                  | €814,295    | €668,664    | €652,788    | €1,014,880  | €1,086,657  | €1,122,744  | €1,321,762  | €962,986    | €1,375,777  | €1,009,461  |
| Colon                   | €468,643    | €221,040    | €325,021    | €224,179    | €246,136    | €375,244    | €617,870    | €572,424    | €609,151    | €559,801    |
| Cutaneous tumors, other | - €         | - €         | - €         | - €         | - €         | - €         | - €         | - €         | - €         | - €         |
| Endometrium             | €3,150      | €1,360      | €660        | €914        | €2,254      | €1,595      | €545        | €1,946      | €28,342     | €24,776     |
| Esophagus               | - €         | €729        | - €         | €216        | €204        | €104        | - €         | €392        | €1,253      | €1,021      |
| Ewing sarcoma           | - €         | €1,096      | €222        | - €         | €2,864      | €1,612      | €1,584      | €5,023      | €5,967      | - €         |
| Extrahepatic bile duct  | €523        | - €         | - €         | - €         | - €         | - €         | - €         | - €         | - €         | €5,850      |
| Gallbladder             | - €         | - €         | - €         | - €         | - €         | - €         | - €         | - €         | - €         | €78         |
| GIST                    | - €         | - €         | - €         | - €         | - €         | - €         | - €         | - €         | - €         | - €         |
| Hepatic carcinoma       | - €         | - €         | - €         | - €         | - €         | - €         | - €         | - €         | €470        | €26,238     |
| Kaposi sarcoma          | - €         | - €         | - €         | - €         | - €         | - €         | - €         | - €         | - €         | - €         |
| Kidney                  | €34,896     | - €         | - €         | €51,867     | - €         | €218,008    | €184,695    | €337,071    | €583,680    | €961,380    |
| Larynx/hypopharynx      | - €         | - €         | €36         | €7,176      | €21,310     | €23,968     | €46,640     | €21,164     | €78,880     | €10,235     |
| Lung, non-small cell    | €115,950    | €120,204    | €168,492    | €159,552    | €282,096    | €442,800    | €613,900    | €793,928    | €1,073,257  | €1,213,712  |
| Lung, small cell        | €1,052      | €340        | €1,490      | €2,128      | €872        | €1,254      | €5,160      | €14,259     | €23,562     | €3,858      |
| Melanoma                | - €         | €1,061      | - €         | €3,843      | €222,957    | €362,193    | €362,484    | €788,270    | €1,404,668  | €1,531,985  |



|                        |             |            |            |            |            |            |            |            |            |            |
|------------------------|-------------|------------|------------|------------|------------|------------|------------|------------|------------|------------|
| Merkel carcinoma       | - €         | - €        | - €        | - €        | - €        | - €        | - €        | - €        | - €        | - €        |
| Mesothelioma           | - €         | - €        | €26,190    | €17,985    | - €70,112  | - €13,989  | €64,820    | €57,244    | €96,888    | €1,530     |
| Neuroendocrine         | - €         | - €        | - €        | - €        | - €        | €2,585     | €160,910   | €437,502   | €438,888   | €235,648   |
| Oral cavity/oropharynx | €28,311     | €3,357     | €14,800    | €23,984    | €34,276    | €109,341   | €289,279   | €310,847   | €170,380   | €139,626   |
| Osteosarcoma           | - €         | €826       | - €        | €2,256     | - €        | - €        | - €        | - €        | - €        | - €        |
| Ovary                  | €115,841    | €71,670    | €77,900    | €102,438   | €50,320    | €53,492    | €80,481    | €49,618    | €233,044   | €192,133   |
| Pancreas endocrine     | €1,002      | €2,285     | €3,016     | €5,916     | €8,378     | - €        | - €        | - €        | €272       | €372       |
| Pancreas exocrine      | €5,970      | €7,485     | €7,530     | €26,200    | €46,384    | €160,012   | €59,706    | €61,292    | €76,333    | €114,262   |
| Penis                  | - €         | - €        | - €        | - €        | - €        | - €        | - €        | - €        | - €        | - €        |
| Primary unknown        | - €         | - €        | - €        | - €        | €135       | €3,328     | €234       | - €        | - €        | - €        |
| Prostate               | €26,928     | €20,538    | €9,703     | €25,783    | €36,975    | €6,950     | €31,092    | €95,032    | €79,530    | €56,034    |
| Rectum                 | €18,774     | €9,450     | €4,003     | €6,412     | €6,610     | €6,472     | €73,602    | €18,224    | €20,557    | €23,802    |
| Rhinopharynx/cavum     | - €         | - €        | - €        | - €        | - €        | - €        | €248       | €284       | €6,895     | €720       |
| Soft tissue sarcoma    | €615        | €12,024    | €15,270    | €5,678     | €11,438    | €26,068    | €54,768    | €45,873    | €315,544   | €87,341    |
| Squamous cell skin     | - €         | - €        | - €        | - €        | - €        | - €        | - €        | - €        | - €        | €144       |
| Stomach                | €6,942      | €14,218    | €12,340    | €21,943    | €23,303    | €50,018    | €82,239    | €117,953   | €152,280   | €110,349   |
| Testicular germ cell   | - €         | €249       | - €        | - €        | - €        | - €        | €772       | - €        | €606       | - €        |
| Thymoma                | - €         | - €        | - €        | - €        | - €        | - €        | - €        | - €        | €178       | €1,314     |
| Thyroid                | - €         | - €        | - €        | - €        | - €        | - €        | €344       | €572       | - €        | - €        |
| Urinary bladder        | €7,888      | €7,272     | €1,014     | €2,772     | €1,140     | €4,186     | €7,770     | €997       | €7,884     | €39,650    |
| Urothelial cancer      | - €         | - €        | - €        | - €        | - €        | - €        | - €        | - €        | - €        | - €        |
| Uterine cervix         | - €         | €3,376     | €565       | €102       | - €        | €2,944     | €15,323    | €23,246    | €363,669   | €209,988   |
| Total (annual)         | €1,650,750  | €1,205,680 | €1,322,395 | €2,349,744 | €2,157,533 | €3,034,919 | €4,087,619 | €4,722,001 | €7,266,822 | €6,666,428 |
| Total (overall)        | €34,463,891 |            |            |            |            |            |            |            |            |            |

GIST: Gastrointestinal Stromal Tumors
